# Supplementary material for: Toughening mechanism in impact polypropylene copolymer containing a β-nucleating agent
Source: Royal Society of Chemistry journal article supplement (doi:10.1039/c6ra01046f), 2016-01-01
Supplement: c6ra01046f1.pdf [file c6ra01046f1.pdf]

## 1 **Supporting Information:**

2 The IPC here is synthesized in a two-stage reaction process, in which the first stage is propylene  
3 homopolymerization and the second stage is successive ethylene-propylene copolymerization in a  
4 gas-phase reactor, with the ethylene content of 13.5mol%. Through temperature-gradient extraction  
5 fractionation (TGEF) and component analysis (by DSC, WAXD and FTIR) of extracted fractions,  
6 the major components of IPC were investigated to be homopolymer polypropylene (HPP),  
7 amorphous ethylene propylene random copolymer (EPR) and ethylene-propylene block copolymer  
8 with different segment lengths (*EbP*). Weight fractions and distribution of the components are shown  
9 in the Table S1.

10

11

Table S1 The structural information of IPC and its components.

| Sample     | Weight fraction (wt %) | $\bar{M}_{n*}$ | $\bar{M}_{w*}$ | $\bar{M}_n/\bar{M}_w$ |
|------------|------------------------|----------------|----------------|-----------------------|
| IPC        | /                      | 4.39E+04       | 1.74E+05       | 3.96                  |
| EPR        | 20.7                   | 1.14E+05       | 3.61E+05       | 3.16                  |
| <i>EbP</i> | 10.1                   | 9.48E+03       | 4.25E+04       | 4.48                  |
| HPP        | 69.2                   | 3.29E+04       | 9.34E+04       | 2.84                  |

12
